# Supplementary material for: Inhibition of Sphingosine Kinase 2 Results in PARK2-Mediated Mitophagy and Induces Apoptosis in Multiple Myeloma
Source: Curr Oncol. 2023 Mar 4;30(3):3047–63. doi: 10.3390/curroncol30030231 (PMC10047154; doi:10.3390/curroncol30030231)
Supplement: Supplementary file 1 [file curroncol-30-00231-s001.zip › curroncol-2250005-supplementary.pdf]

# Inhibition of Sphingosine Kinase 2 Results in PARK2-Mediated Mitophagy and Induces Apoptosis in Multiple Myeloma

**A**

**GSE6477**

SPHK1 (219257\_s\_at) expression levels

ND MGUS SMM New MM Relapsed

**GSE13591**

SPHK1 (219257\_s\_at) expression levels

NPC MGUS MM

**B**

**219257\_s\_at (SPHK1)**

Overall survival

P=0.11, HR=0.54

— n = 366 (88.4%)  
— n = 48 (11.6%)

OS\_MONTHS

**219257\_s\_at (SPHK1)**

Expression signal

Samples

**Maximally selected rank statistics**

Standardized log-rank statistic

Cutpoint = 219.7

Expression of 219257\_s\_at (SPHK1)

Flow cytometry plots showing the effect of ABC294640 and Lenti-shSK2 on H929 and MM1.S cells. The plots are arranged in a 2x4 grid, with rows for H929 and MM1.S cells, and columns for ABC294640 treatment (- and +) and Lenti-shSK2 treatment (- and +). Each plot shows the percentage of cells in four quadrants (Q1, Q2, Q3, Q4) relative to DAPI (x-axis) and CD138 (y-axis). The plots are color-coded by density, with red indicating the highest density.

**H929**

| ABC294640 | Lenti-shSK2 | Q1 (%) | Q2 (%) | Q3 (%) | Q4 (%) |
|-----------|-------------|--------|--------|--------|--------|
| -         | -           | 0.37   | 69.6   | 9.92   | 0.073  |
| +         | -           | 0.022  | 73.4   | 26.5   | 0      |
| -         | +           | 0.58   | 79.2   | 19.8   | 0.041  |
| +         | +           | 0.012  | 22.5   | 77.5   | 0      |

**MM1.S**

| ABC294640 | Lenti-shSK2 | Q1 (%) | Q2 (%) | Q3 (%) | Q4 (%) |
|-----------|-------------|--------|--------|--------|--------|
| -         | -           | 0.90   | 90.7   | 8.34   | 0.070  |
| +         | -           | 2.00   | 77.8   | 20.0   | 0.12   |
| -         | +           | 0.067  | 45.0   | 55.0   | 0      |
| +         | +           | 0.012  | 54.3   | 45.7   | 0      |

[www.mdpi.com/journal/currencol](http://www.mdpi.com/journal/currencol)

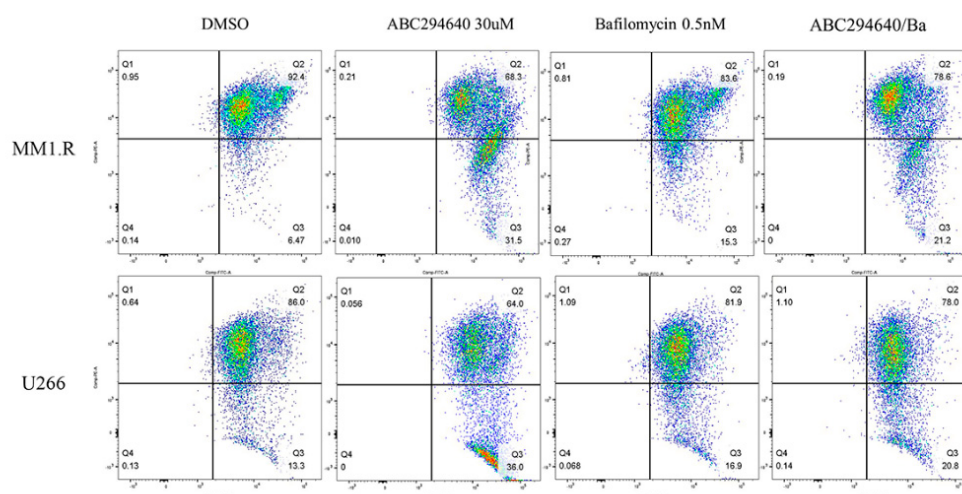

**Figure S3.** Using Bafilomycin reduced the ABC294640-induced mitophagy. Combination ABC294640 with bafilomycin in MM1.R and U266 48h, JC-1 assay was performed to display the mitochondrial membrane potential.

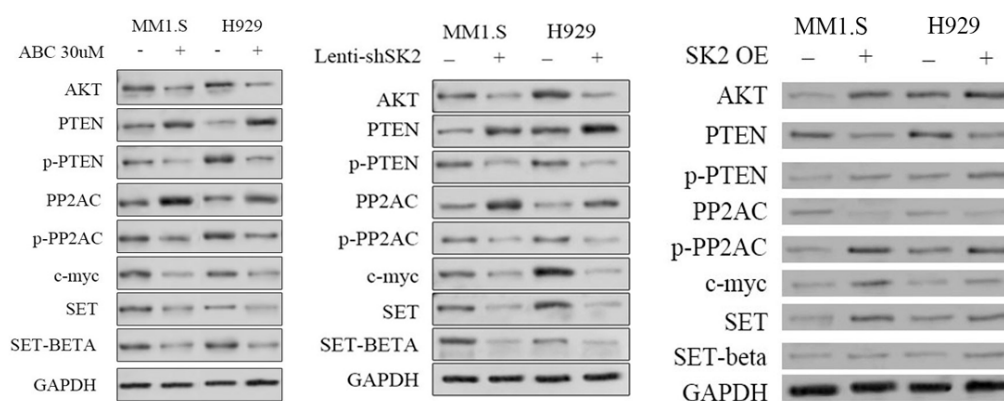

**Figure S4.** Inhibition SK2 involved AKT/c-Myc/SET pathway. ABC294640 or Lenti-shsk2 were used to inhibit SK2 expression in MM1S and H929 cell lines. Protein lysates were subjected to western blot with indicated antibodies (left and middle). MM1.S and H929 were transfected with SK2 plasmid 48h, total protein lysates were subjected to western blot with indicated antibodies(right).

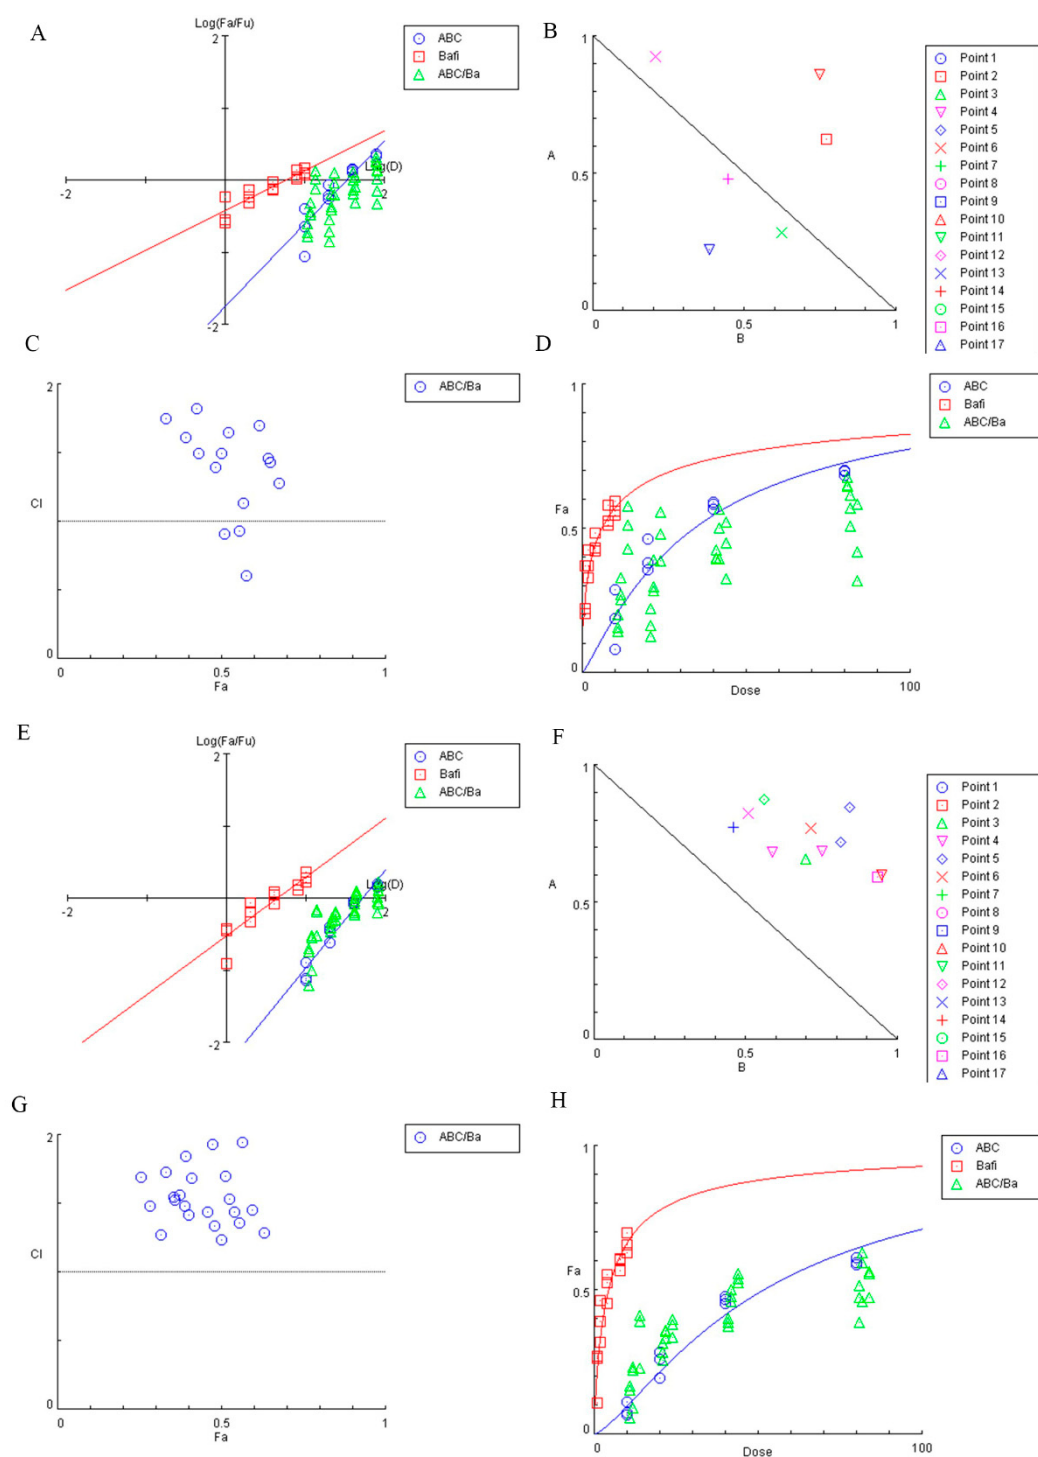

**Figure S5.** The graphic representations obtained from the CompuSyn Report for ABC294640 and Bafilomycin in MM1.R and U266. (A, E) Median-effect plot; (B, F) Isobolograms; (C, G) Combination index plot; (D, H) Dose-effect curve.

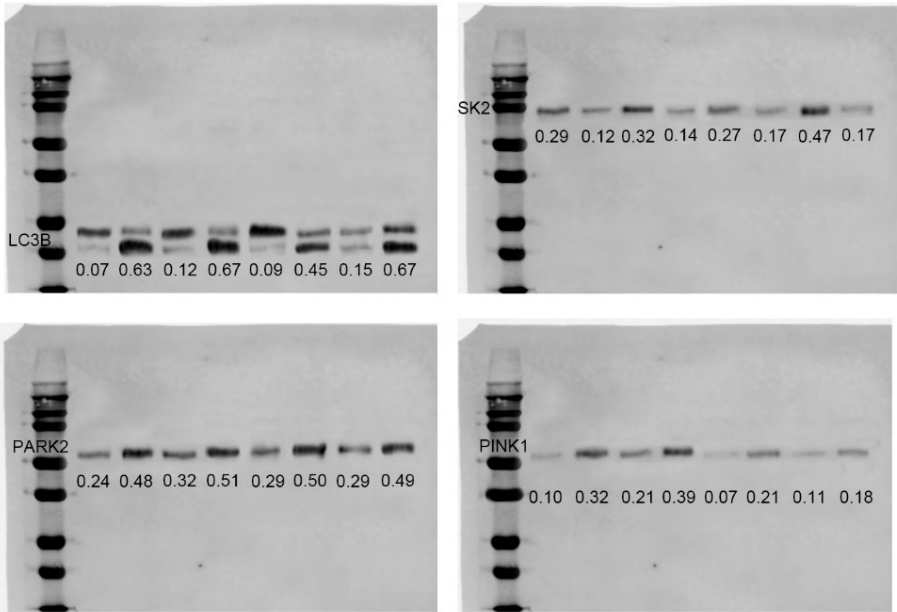

Figure S6. The raw data and the intensity ratio of Figure 2E.

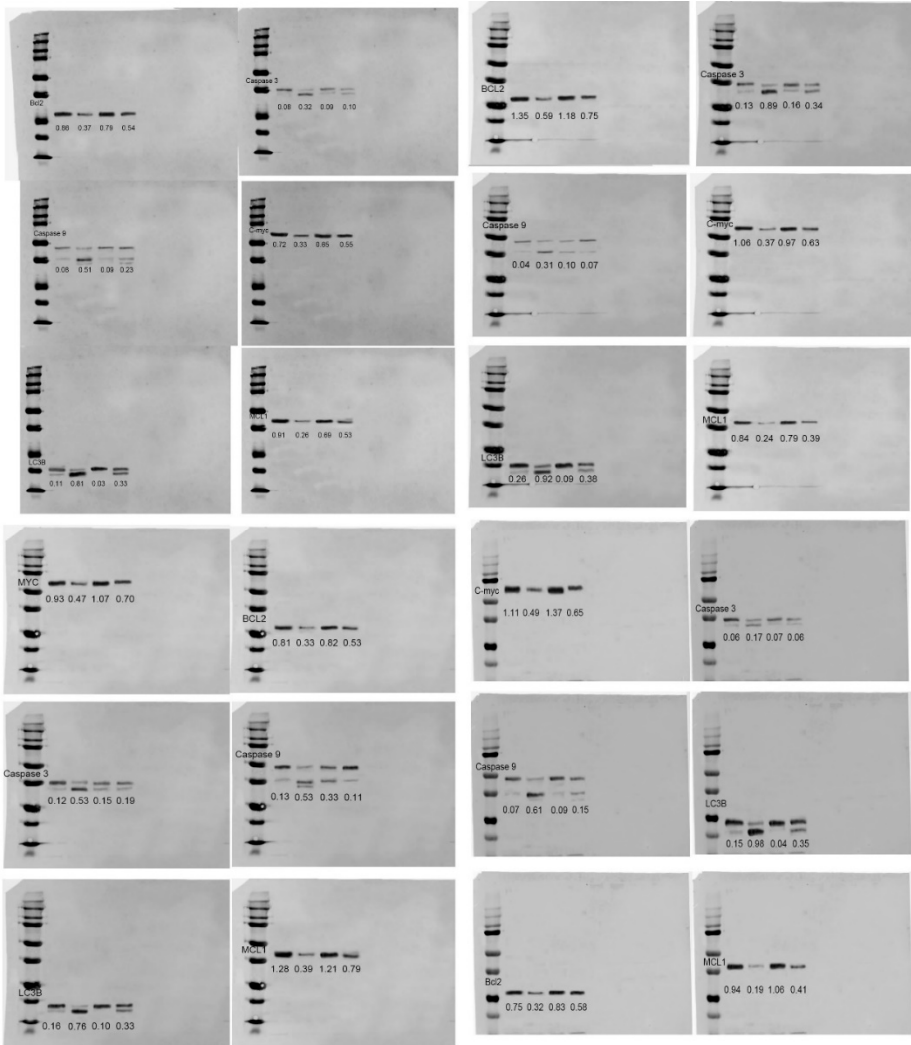

Figure S7. The raw data and the intensity ratio of Figure 3.

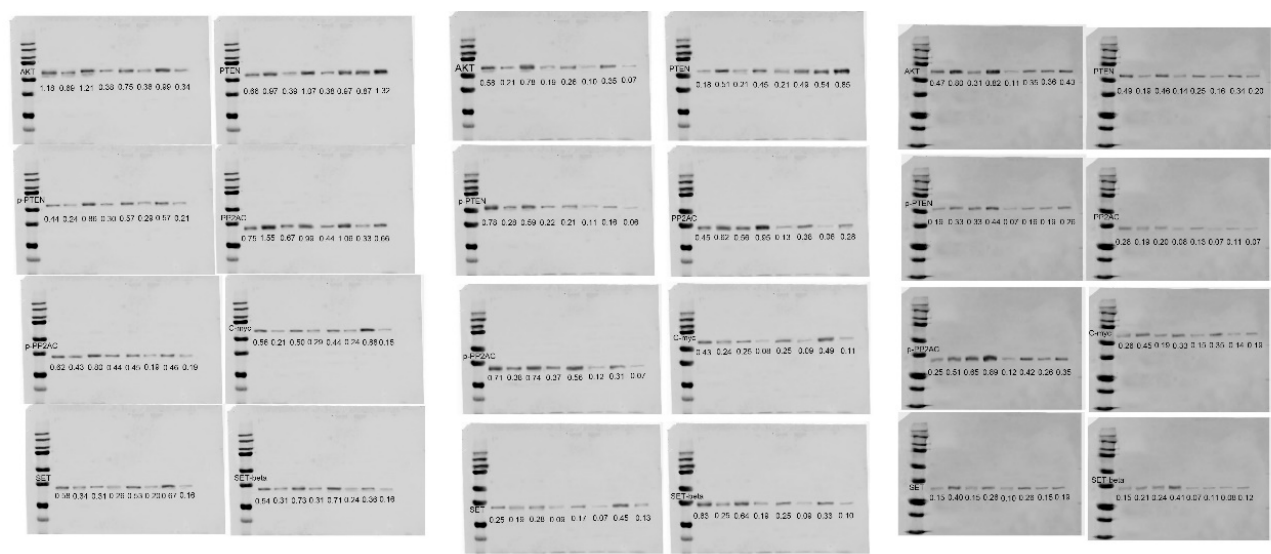

Figure S8. The raw data and the intensity ratio of Figure 4 and Figure S4.

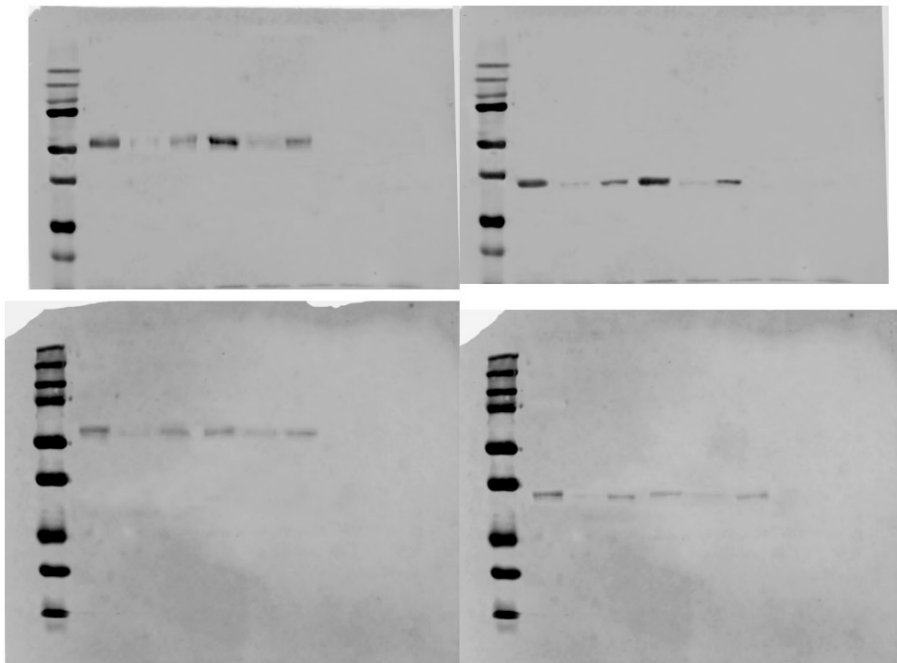

Figure S9. The co-IP raw data of Figure 4D.

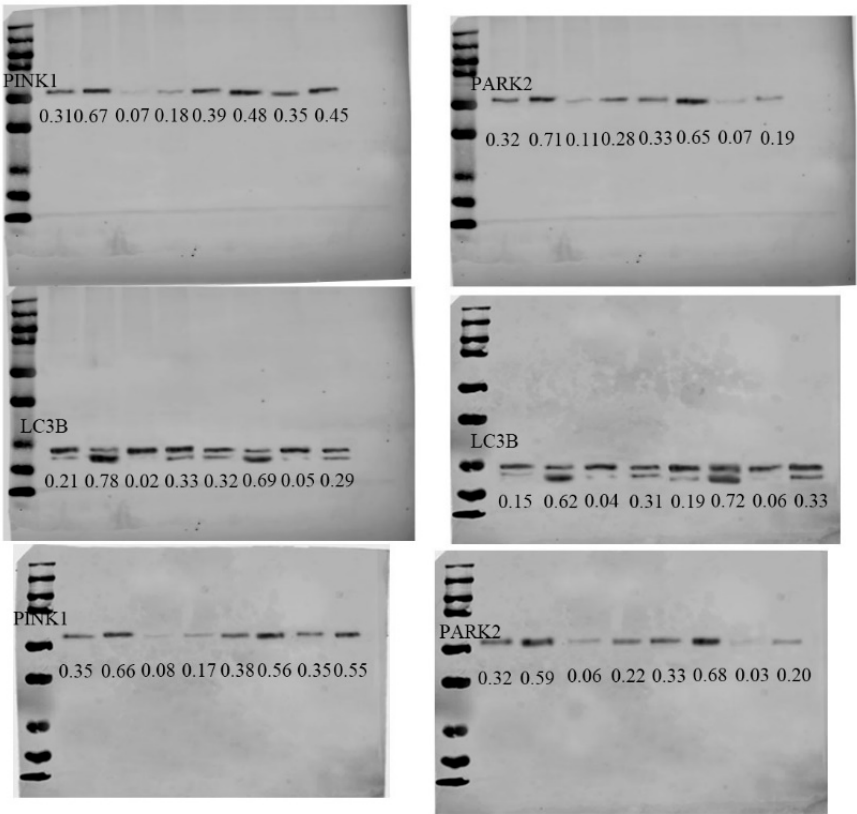

Figure S10. The raw data and the intensity ratio of Figure 6.
